# Supplementary material for: Efficient vacuum-free-processed quantum dot light-emitting diodes with printable liquid metal cathodes
Source: Royal Society of Chemistry journal article supplement (doi:10.1039/c6nr05181b), 2016-01-01
Supplement: c6nr05181b1.pdf [file c6nr05181b1.pdf]

## Supporting Information

### **Efficient vacuum-free-processed quantum dot light-emitting diodes with printable liquid metal cathodes**

Huiren Peng, Yibin Jiang, Shuming Chen\*

Department of Electrical and Electronic Engineering, Southern University of Science  
and Technology, Shenzhen, 518055, P. R. China

[chen.sm@sustc.edu.cn](mailto:chen.sm@sustc.edu.cn)

\*Correspondence and requests for material to S.C. ([chen.sm@sustc.edu.cn](mailto:chen.sm@sustc.edu.cn))

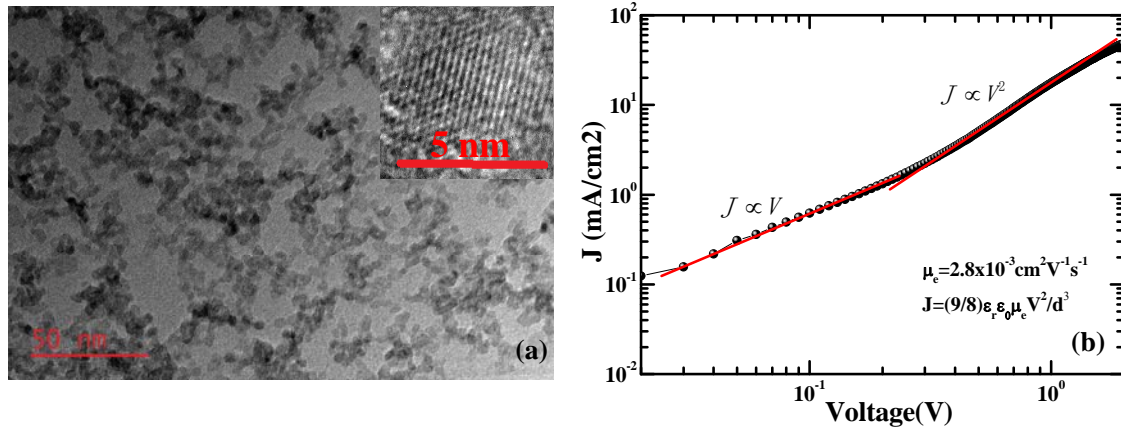

Figure S1. Characterization of ZnO nanoparticle: (a) TEM image of the ZnO nanoparticles (5 nm in diameter); (b) Current density-voltage characteristics (J-V) of an electron-only device (ITO/ZnO/Al). The thickness of the ZnO layer is 400 nm. The electron mobility of the ZnO film is obtained by fitting space-charge-limited-current region, ( $J \propto v^2$ ) with Child's law,  $J=(9/8)\epsilon_r\epsilon_0\mu_eV^2/d^3$ , where  $\epsilon_0$ ,  $\epsilon_r$ ,  $\mu_e$  and  $d$  are the vacuum permittivity, relative permittivity, electron mobility and film thickness, respectively [1,2]. By assuming that  $\epsilon_r=4$ ,  $\mu_e$  is determined to be  $2.8 \times 10^{-3} \text{ cm}^2\text{V}^{-1}\text{s}^{-1}$ .

## References

- [1]. Qian, L.; Zheng, Y.; Xue, J.; Holloway, P. H. Stable and efficient quantum-dot light-emitting diodes based on solution-processed multilayer structures. *Nat. Photonics* **2011**, 5(9), 543-548.
- [2]. Dai, X.; Zhang, Z.; Jin, Y.; Niu, Y.; Cao, H.; Liang, X.; Chen, L.; Wang, J.; Peng, X. Solution-processed, high-performance light-emitting diodes based on quantum dots. *Nature* **2014**, 515(7525), 96-99.

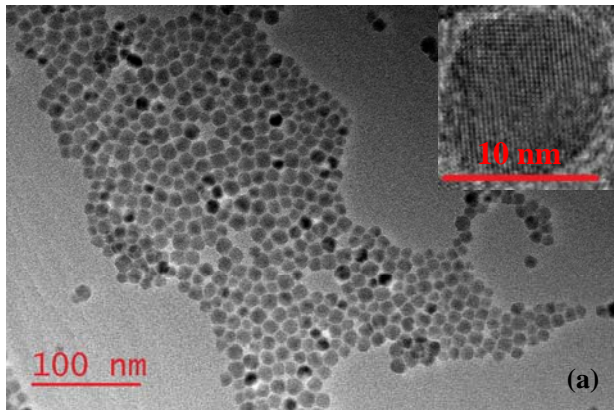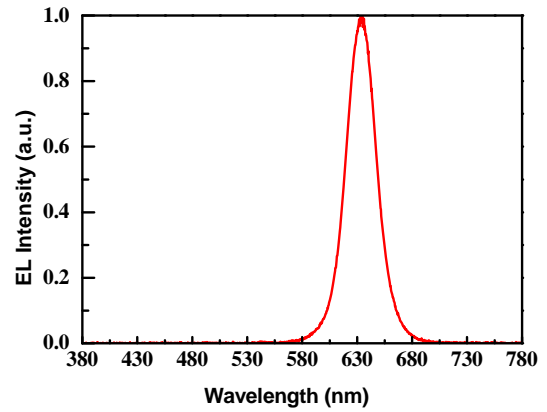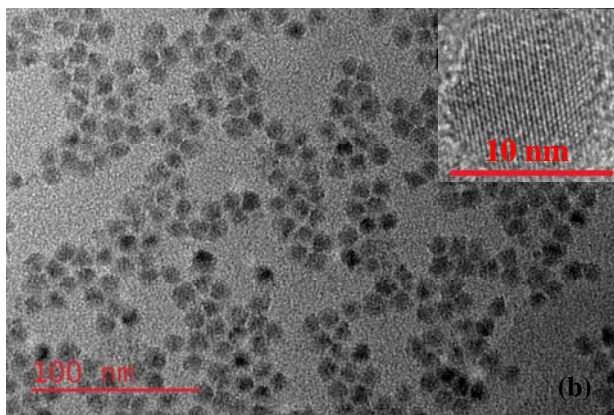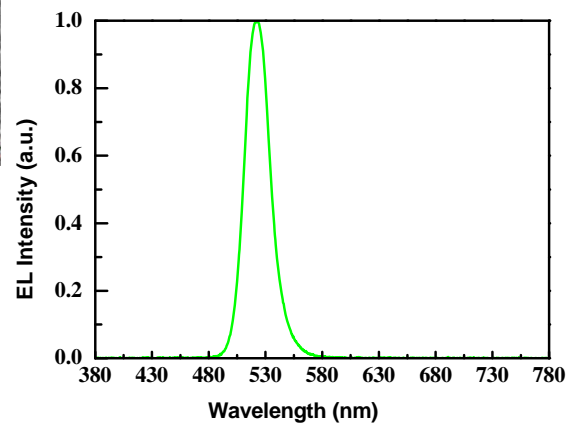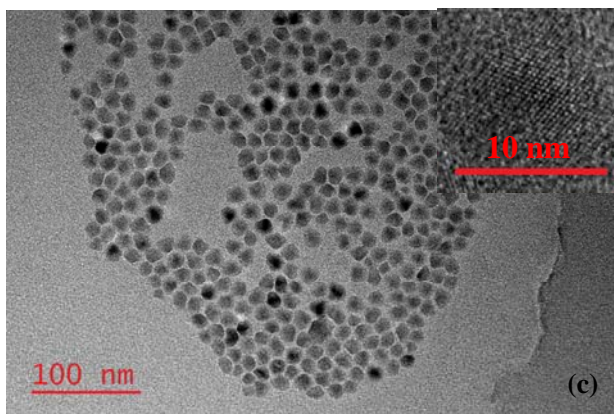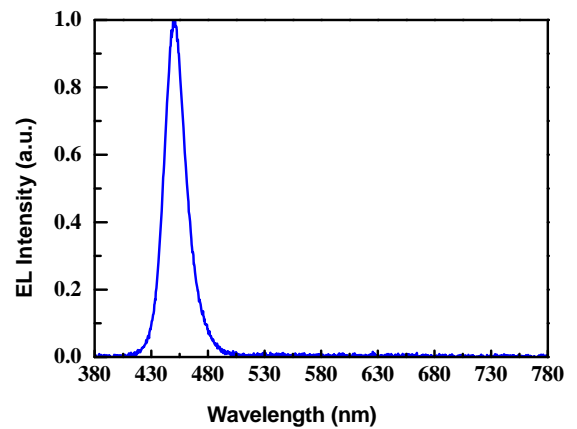

Figure S2. Characterization of quantum dots : The TEM images of the QDs were obtained using Tecnai F30 microscope at imaging center of Southern University of Science and Technology. (a) CdZnSe/CdS/ZnS red QDs, (b) CdZnSeS/ZnS green QDs, and (c) ZnCdS/ZnS blue QDs.
